# Supplementary material for: Trends and sociodemographic inequalities in the use of caesarean section in Indonesia, 1987-2017
Source: PubMed Central journal article supplement — BMJ Glob Health. 2020 Dec 30;5(12):e003844. doi: 10.1136/bmjgh-2020-003844 (PMC7780721; doi:10.1136/bmjgh-2020-003844), 2020-12-30
Supplement: bmjgh-2020-003844supp001.pdf [file bmjgh-2020-003844supp001.pdf]

## Appendix

This appendix includes tables showing the analysis of births and CSRs trends across different type of birth facility which has been graphed on Figure 1 Panel A and B, the proportion calculations of CSRs in Indonesia by 34 provinces in 2017 which is represented on Figure 1 panel C, births differentials in Indonesia by main regions and socio-economic status in 2017 which has been graphed on Figure 3, and the analysis of CS timing across regions and economic status in 2017 which can be seen visually on Figure 4.

**Appendix Table 1.** Trends of births and CSRs at different type of birth facility (private, public facility, and others).

| Year | Place of births (%)* |                  |                  | Caesarean section rates (%)** |                                  |                                 |
|------|----------------------|------------------|------------------|-------------------------------|----------------------------------|---------------------------------|
|      | Private facility     | Public facility  | Other***         | Among all births              | Among births at private facility | Among births at public facility |
| 1991 | 12.7 (11.4-14.2)     | 9.2 (8.2-10.2)   | 78.1 (76.3-79.9) | 1.6 (1.3-1.9)                 | 3.6 (2.5-5.0)                    | 7.1 (5.3-9.3)                   |
| 1994 | 9.9 (8.9-11.2)       | 8.1 (7.3-9.0)    | 81.9 (80.3-83.5) | 2.7 (2.3-3.1)                 | 7.3 (5.3-10.1)                   | 11.2 (8.8-14.1)                 |
| 1997 | 12.2 (10.9-13.7)     | 9.0 (8.2-9.9)    | 78.8 (76.9-80.5) | 4.7 (4.1-5.4)                 | 9.2 (7.4-11.4)                   | 14.3 (11.9-17.2)                |
| 2002 | 31.5 (29.3-33.8)     | 9.4 (8.3-10.5)   | 59.1 (56.5-61.6) | 4.1 (3.5-4.9)                 | 8.7 (7.0-10.7)                   | 15.0 (12.0-18.6)                |
| 2007 | 37.8 (35.7-40.0)     | 9.9 (9.0-10.8)   | 52.1 (49.9-54.3) | 7.2 (6.5-8.1)                 | 13.6 (11.8-15.5)                 | 21.1 (18.3-24.2)                |
| 2012 | 47.2 (45.4-49.1)     | 17.6 (16.5-18.7) | 35.2 (33.4-37.0) | 12.7 (11.8-13.7)              | 17.5 (16.1-19.1)                 | 25.3 (22.9-27.8)                |
| 2017 | 49.4 (48.0-50.9)     | 31.2 (30.1-32.4) | 19.3 (18.1-20.7) | 17.6 (16.7-18.5)              | 22.0 (20.6-23.4)                 | 21.6 (20.1-23.1)                |

\*Birth rate is the percentage of births at public facility, private facility, and others, among all live births five years preceding the survey. If a woman has more than one birth during this period, only the last birth is included.

\*\*Caesarean section rate is the percentage of caesarean section among all live births five years preceding the survey. If a woman has more than one birth during this period, only the last birth is included. The caesarean section rate at public facility is percentage of caesarean section among all live births five years preceding the survey at public facility. The caesarean section rate at private facility is the percentage of caesarean sections among all live births five years preceding the survey at private facility.

\*\*\*Others include private homes and other non-facility-based births.
