# Supplementary material for: Trends and sociodemographic inequalities in the use of caesarean section in Indonesia, 1987-2017
Source: PubMed Central journal article supplement — BMJ Glob Health. 2020 Dec 30;5(12):e003844. doi: 10.1136/bmjgh-2020-003844 (PMC7780721; doi:10.1136/bmjgh-2020-003844), 2020-12-30
Supplement: bmjgh-2020-003844supp002.pdf [file bmjgh-2020-003844supp002.pdf]

## Appendix

This appendix includes tables showing the analysis of births and CSRs trends across different type of birth facility which has been graphed on Figure 1 Panel A and B, the proportion calculations of CSRs in Indonesia by 34 provinces in 2017 which is represented on Figure 1 panel C, births differentials in Indonesia by main regions and socio-economic status in 2017 which has been graphed on Figure 3, and the analysis of CS timing across regions and economic status in 2017 which can be seen visually on Figure 4.

**Appendix Table 2.** Proportions of CS in Indonesia by 34 provinces in 2017.

| Provinces              | Caesarean section rates (%) | 95% CI             | Before labour onset (%) | 95% CI             | After labour onset (%) | 95% CI             |
|------------------------|-----------------------------|--------------------|-------------------------|--------------------|------------------------|--------------------|
| <b>JAVA &amp; BALI</b> | <b>18.8</b>                 | <b>17.4 - 20.2</b> | <b>35.9</b>             | <b>32.6 - 39.2</b> | <b>64.2</b>            | <b>60.8 - 67.4</b> |
| <b>Jakarta Raya</b>    | <b>31.3</b>                 | <b>26.3 - 36.8</b> | <b>37.1</b>             | <b>29.5 - 45.5</b> | <b>62.9</b>            | <b>54.6 - 70.5</b> |
| Banten                 | 17.1                        | 13.2 - 21.9        | 26.1                    | 18.6 - 35.4        | 73.9                   | 64.6 - 81.4        |
| West Java              | 13.3                        | 11.2 - 15.8        | 39.6                    | 32.9 - 46.8        | 60.4                   | 53.2 - 67.2        |
| Central Java           | 16.0                        | 13.5 - 19.0        | 32.6                    | 25.7 - 40.4        | 67.4                   | 59.6 - 74.4        |
| East Java              | 24.5                        | 21.2 - 28.2        | 33.7                    | 27.1 - 41.0        | 66.3                   | 59.0 - 72.9        |
| Yogyakarta             | 24.1                        | 18.6 - 30.5        | 39.0                    | 23.2 - 57.6        | 61.0                   | 42.4 - 76.8        |
| <b>Bali</b>            | <b>33.4</b>                 | <b>27.3 - 40.1</b> | <b>50.1</b>             | <b>39.8 - 60.4</b> | <b>49.9</b>            | <b>39.6 - 60.2</b> |
| <b>SUMATRA</b>         | <b>19.4</b>                 | <b>17.9 - 21.1</b> | <b>45.7</b>             | <b>41.6 - 49.8</b> | <b>54.3</b>            | <b>50.2 - 58.4</b> |
| Aceh                   | 22.3                        | 18.8 - 26.2        | 44.0                    | 36.5 - 51.8        | 56.0                   | 48.2 - 63.5        |
| Bangka-Belitung        | 16.3                        | 13.2 - 19.9        | 33.4                    | 17.1 - 54.9        | 66.6                   | 45.1 - 82.9        |
| Jambi                  | 20.3                        | 15.5 - 26.3        | 41.3                    | 28.1 - 56.0        | 58.7                   | 44.0 - 71.9        |

|                           |             |                    |             |                    |             |                    |
|---------------------------|-------------|--------------------|-------------|--------------------|-------------|--------------------|
| Riau                      | 17.9        | 14.3 - 22.1        | 43.1        | 30.5 - 56.6        | 57.0        | 43.4 - 69.5        |
| <b>Riau Islands</b>       | <b>25.6</b> | <b>20.9 - 30.9</b> | <b>52.9</b> | <b>40.4 - 65.0</b> | <b>47.1</b> | <b>35.0 - 59.6</b> |
| Bengkulu                  | 19.6        | 14.6 - 25.9        | 42.4        | 28.8 - 57.3        | 57.6        | 42.7 - 71.2        |
| Lampung                   | 16.4        | 12.2 - 21.6        | 38.0        | 27.7 - 49.6        | 62.0        | 50.4 - 72.4        |
| West Sumatra              | 24.0        | 18.4 - 30.8        | 49.1        | 34.3 - 64.1        | 50.9        | 35.9 - 65.7        |
| South Sumatra             | 10.9        | 7.7 - 15.1         | 50.8        | 30.6 - 70.6        | 49.3        | 29.4 - 69.4        |
| North Sumatra             | 23.9        | 19.8 - 28.5        | 49.0        | 41.2 - 56.8        | 51.0        | 43.2 - 58.8        |
| <b>NUSA<br/>TENGGARA</b>  | <b>9.9</b>  | <b>7.9 - 12.4</b>  | <b>33.5</b> | <b>24.1 - 44.4</b> | <b>66.5</b> | <b>55.6 - 75.9</b> |
| West Nusa Tenggara        | 12.5        | 9.0 - 17.1         | 32.2        | 19.3 - 48.4        | 67.8        | 51.6 - 80.7        |
| <b>East Nusa Tenggara</b> | <b>7.4</b>  | <b>5.5 - 9.8</b>   | <b>35.8</b> | <b>24.4 - 49.1</b> | <b>64.2</b> | <b>50.9 - 75.6</b> |
| <b>KALIMANTAN</b>         | <b>13.6</b> | <b>11.3 - 16.2</b> | <b>36.1</b> | <b>29.5 - 43.4</b> | <b>63.9</b> | <b>56.6 - 70.6</b> |
| <b>West Kalimantan</b>    | <b>9.4</b>  | <b>5.5 - 15.5</b>  | <b>18.4</b> | <b>7.0 - 40.4</b>  | <b>81.6</b> | <b>59.6 - 93.0</b> |
| South Kalimantan          | 16.9        | 12.0 - 23.3        | 31.4        | 20.2 - 45.3        | 68.6        | 54.7 - 79.8        |
| Central Kalimantan        | 11.6        | 7.0 - 18.8         | 61.7        | 44.4 - 76.5        | 38.3        | 23.5 - 55.6        |
| East Kalimantan           | 16.6        | 13.2 - 20.7        | 43.3        | 30.1 - 57.5        | 56.7        | 42.5 - 69.9        |
| North Kalimantan          | 17.5        | 10.6 - 27.6        | 41.5        | 25.6 - 59.4        | 58.5        | 40.6 - 74.4        |
| <b>SULAWESI</b>           | <b>14.1</b> | <b>12.2 - 16.3</b> | <b>48.2</b> | <b>40.1 - 56.3</b> | <b>51.8</b> | <b>43.7 - 59.9</b> |

|                           |            |                   |             |                    |             |                    |
|---------------------------|------------|-------------------|-------------|--------------------|-------------|--------------------|
| West Sulawesi             | 12.6       | 9.9 - 15.8        | 28.0        | 18.9 - 39.3        | 72.0        | 60.7 - 81.1        |
| South Sulawesi            | 14.2       | 10.7 - 18.5       | 46.4        | 32.4 - 61.0        | 53.6        | 39.0 - 67.6        |
| Central Sulawesi          | 15.0       | 10.0 - 21.8       | 52.8        | 33.4 - 71.5        | 47.2        | 28.5 - 66.6        |
| <b>Southeast Sulawesi</b> | <b>9.3</b> | <b>7.0 - 12.2</b> | <b>44.2</b> | <b>29.1 - 60.4</b> | <b>55.8</b> | <b>39.6 - 70.9</b> |
| North Sulawesi            | 19.4       | 14.2 - 26.0       | 49.9        | 27.9 - 72.0        | 50.1        | 28.0 - 72.1        |
| Gorontalo                 | 16.3       | 12.4 - 21.1       | 67.3        | 47.8 - 82.2        | 32.7        | 17.8 - 52.2        |
| <b>MALUKU &amp; PAPUA</b> | <b>9.4</b> | <b>7.3 - 12.1</b> | <b>55.7</b> | <b>39.7 - 70.5</b> | <b>44.3</b> | <b>29.5 - 60.3</b> |
| West Papua                | 10.4       | 6.1 - 17.4        | 21.7        | 9.3 - 42.9         | 78.3        | 57.1 - 90.7        |
| <b>North Maluku</b>       | <b>6.7</b> | <b>4.3 - 10.3</b> | <b>54.0</b> | <b>35.8 - 71.2</b> | <b>46.0</b> | <b>28.8 - 64.2</b> |
| Maluku                    | 10.2       | 7.2 - 14.3        | 57.8        | 44.6 - 70.0        | 42.2        | 30.0 - 55.4        |
| <b>Papua</b>              | <b>9.8</b> | <b>6.1 - 15.3</b> | <b>62.4</b> | <b>29.7 - 86.7</b> | <b>37.6</b> | <b>13.3 - 70.3</b> |

\***Blue:** CSRs above 25%

\***Red:** CSRs below 10%

\*This table shows variations of CSRs in 2017 across provinces in Indonesia. This table is presented through map and can be seen on Figure 1, Panel C. This table shows that the highest CSRs (> 25%) are observed in the Western area, including Bali (33.4%, 95%CI: 27.3-40.1), Jakarta (31.3%, 95%CI: 26.3-36.8), and Riau Islands (25.6%, 95%CI: 20.9-30.9). While the areas with lowest CSRs (<10%) are observed only in Eastern Indonesia: North Maluku (6.7%, 95%CI: 4.3-10.3), East Nusa Tenggara (7.4%, 95%CI: 5.59.8), Southeast Sulawesi (9.3%, 95%CI: 7.0-12.2), and Papua (9.8%, 95%CI: 6.1-15.3), except West Kalimantan (9.4%, 95%CI: 5.5-15.5).
