# Supplementary material for: Trends and sociodemographic inequalities in the use of caesarean section in Indonesia, 1987-2017
Source: PubMed Central journal article supplement — BMJ Glob Health. 2020 Dec 30;5(12):e003844. doi: 10.1136/bmjgh-2020-003844 (PMC7780721; doi:10.1136/bmjgh-2020-003844), 2020-12-30
Supplement: bmjgh-2020-003844supp003.pdf [file bmjgh-2020-003844supp003.pdf]

## Appendix

This appendix includes tables showing the analysis of births and CSRs trends across different type of birth facility which has been graphed on Figure 1 Panel A and B, the proportion calculations of CSRs in Indonesia by 34 provinces in 2017 which is represented on Figure 1 panel C, births differentials in Indonesia by main regions and socio-economic status in 2017 which has been graphed on Figure 3, and the analysis of CS timing across regions and economic status in 2017 which can be seen visually on Figure 4.

**Appendix Table 3.** Birth differentials in Indonesia by main regions and socio-economic status in 2017.

| Birth Rates            | Births (N=15,028)         |      |             |                 |     |           |                            |      |             |                 |      |             |                  |      |             |
|------------------------|---------------------------|------|-------------|-----------------|-----|-----------|----------------------------|------|-------------|-----------------|------|-------------|------------------|------|-------------|
|                        | Public Facility (N=5,333) |      |             |                 |     |           | Private Facility (N=6,011) |      |             |                 |      |             | Others (N=3,684) |      |             |
|                        | Vaginal Birth             |      |             | Caesarean Birth |     |           | Vaginal Birth              |      |             | Caesarean Birth |      |             |                  |      |             |
|                        | N                         | %    | 95% CI      | N               | %   | 95% CI    | N                          | %    | 95% CI      | N               | %    | 95% CI      | N                | %    | 95% CI      |
| <b>Java &amp; Bali</b> |                           |      |             |                 |     |           |                            |      |             |                 |      |             |                  |      |             |
| Q1 (Poorest)           | 138                       | 29.5 | 24.7 - 34.8 | 14              | 2.6 | 1.6 - 4.4 | 152                        | 30.8 | 26.5 - 35.6 | 16              | 3.0  | 1.8 - 5.0   | 146              | 34.0 | 28.3 - 40.3 |
| Q2                     | 225                       | 28.4 | 25.1 - 32.0 | 42              | 5.2 | 3.7 - 7.2 | 369                        | 45.9 | 41.9 - 50.0 | 39              | 4.8  | 3.5 - 6.6   | 116              | 15.6 | 12.6 - 19.2 |
| Q3                     | 285                       | 27.5 | 24.6 - 30.6 | 70              | 6.5 | 5.0 - 8.4 | 501                        | 48.3 | 44.8 - 51.8 | 76              | 7.2  | 5.7 - 9.1   | 107              | 10.5 | 8.3 - 13.3  |
| Q4                     | 256                       | 21.0 | 18.6 - 23.6 | 90              | 7.1 | 5.7 - 8.8 | 629                        | 50.6 | 47.6 - 53.7 | 193             | 15.6 | 13.5 - 18.0 | 67               | 5.7  | 4.3 - 7.4   |
| Q5 (Richest)           | 154                       | 12.0 | 10.1 - 14.3 | 81              | 6.2 | 4.9 - 7.8 | 672                        | 54.5 | 51.4 - 57.6 | 329             | 25.7 | 23.0 - 28.5 | 22               | 1.6  | 1.0 - 2.4   |
| <b>Sumatra</b>         |                           |      |             |                 |     |           |                            |      |             |                 |      |             |                  |      |             |
| Q1 (Poorest)           | 208                       | 23.0 | 19.0 - 27.6 | 40              | 3.9 | 2.7 - 5.6 | 190                        | 22.7 | 18.3 - 27.7 | 34              | 4.1  | 2.8 - 5.9   | 373              | 46.4 | 40.7 - 52.1 |

|                      |     |      |             |    |      |             |     |      |             |     |      |             |     |      |             |
|----------------------|-----|------|-------------|----|------|-------------|-----|------|-------------|-----|------|-------------|-----|------|-------------|
| Q2                   | 195 | 22.5 | 19.1 - 26.4 | 77 | 6.9  | 5.5 - 8.6   | 275 | 31.3 | 27.1 - 35.8 | 70  | 8.1  | 6.0 - 10.7  | 246 | 31.2 | 26.6 - 36.2 |
| Q3                   | 149 | 15.4 | 13.0 - 18.0 | 70 | 6.9  | 5.3 - 9.0   | 339 | 38.7 | 34.4 - 43.1 | 111 | 14.6 | 12.1 - 17.5 | 176 | 24.5 | 20.4 - 29.1 |
| Q4                   | 98  | 12.3 | 9.7 - 15.3  | 75 | 7.6  | 5.8 - 9.8   | 307 | 42.2 | 37.4 - 47.0 | 126 | 17.3 | 14.5 - 20.6 | 134 | 20.7 | 16.8 - 25.1 |
| Q5 (Richest)         | 69  | 10.1 | 7.5 - 13.3  | 84 | 11.0 | 8.3 - 14.4  | 292 | 45.1 | 40.2 - 50.2 | 159 | 24.5 | 21.0 - 28.5 | 52  | 9.3  | 6.8 - 12.5  |
| <b>Kalimantan</b>    |     |      |             |    |      |             |     |      |             |     |      |             |     |      |             |
| Q1 (Poorest)         | 74  | 20.7 | 14.5 - 28.5 | 15 | 4.9  | 2.5 - 9.4   | 26  | 10.4 | 5.8 - 18.0  | 4   | 1.4  | 0.5 - 3.8   | 157 | 62.6 | 52.8 - 71.5 |
| Q2                   | 105 | 29.2 | 22.8 - 36.7 | 28 | 8.4  | 5.5 - 12.7  | 68  | 22.1 | 17.8 - 27.2 | 7   | 2.3  | 1.0 - 4.9   | 104 | 38.0 | 30.7 - 45.8 |
| Q3                   | 81  | 24.9 | 19.2 - 31.7 | 36 | 10.3 | 7.0 - 14.8  | 121 | 34.1 | 27.8 - 41.1 | 14  | 3.2  | 1.7 - 5.8   | 87  | 27.5 | 21.8 - 34.1 |
| Q4                   | 60  | 23.2 | 17.3 - 30.3 | 28 | 12.5 | 8.5 - 17.9  | 102 | 38.5 | 31.4 - 46.2 | 15  | 6.4  | 3.6 - 11.0  | 42  | 19.5 | 13.9 - 26.5 |
| Q5 (Richest)         | 38  | 16.2 | 11.0 - 23.3 | 33 | 14.0 | 9.2 - 20.7  | 96  | 41.8 | 33.7 - 50.4 | 28  | 12.4 | 8.3 - 18.3  | 23  | 15.5 | 9.8 - 23.7  |
| <b>Sulawesi</b>      |     |      |             |    |      |             |     |      |             |     |      |             |     |      |             |
| Q1 (Poorest)         | 314 | 38.6 | 33.5 - 44.0 | 41 | 5.6  | 3.9 - 8.1   | 40  | 6.6  | 4.5 - 9.6   | 9   | 1.4  | 0.6 - 3.0   | 427 | 47.8 | 42.5 - 53.2 |
| Q2                   | 233 | 45.1 | 39.8 - 50.5 | 43 | 9.0  | 6.3 - 12.8  | 63  | 13.7 | 9.7 - 19.1  | 15  | 3.6  | 2.0 - 6.4   | 155 | 28.5 | 23.9 - 33.6 |
| Q3                   | 149 | 45.5 | 39.2 - 52.0 | 39 | 9.7  | 6.5 - 14.1  | 65  | 21.6 | 16.4 - 28.1 | 18  | 4.7  | 2.8 - 7.8   | 72  | 18.5 | 14.0 - 23.9 |
| Q4                   | 104 | 38.5 | 30.8 - 46.9 | 37 | 13.2 | 8.5 - 20.2  | 55  | 24.7 | 17.8 - 33.2 | 23  | 8.4  | 5.5 - 12.7  | 47  | 15.1 | 11.1 - 20.3 |
| Q5 (Richest)         | 81  | 25.9 | 20.2 - 32.4 | 42 | 15.2 | 10.9 - 20.7 | 84  | 33.8 | 27.3 - 40.9 | 45  | 15.1 | 10.7 - 20.8 | 35  | 10.1 | 6.6 - 15.3  |
| <b>Nusa Tenggara</b> |     |      |             |    |      |             |     |      |             |     |      |             |     |      |             |

|                           |     |      |             |    |      |             |    |      |             |    |     |             |     |      |             |
|---------------------------|-----|------|-------------|----|------|-------------|----|------|-------------|----|-----|-------------|-----|------|-------------|
| Q1 (Poorest)              | 451 | 59.2 | 53.2 - 65.0 | 44 | 5.6  | 3.9 - 7.8   | 27 | 3.7  | 2.3 - 6.0   | 2  | 0.2 | 0.03 - 1.7  | 237 | 31.3 | 25.6 - 37.5 |
| Q2                        | 158 | 65.8 | 56.6 - 73.9 | 21 | 8.5  | 5.3 - 13.3  | 24 | 10.9 | 6.1 - 18.7  | 10 | 3.3 | 1.7 - 6.4   | 27  | 11.5 | 6.5 - 19.6  |
| Q3                        | 71  | 62.9 | 53.8 - 71.2 | 12 | 9.9  | 5.8 - 16.4  | 20 | 15.0 | 9.9 - 22.1  | 4  | 2.8 | 0.9 - 8.2   | 9   | 9.5  | 4.2 - 19.9  |
| Q4                        | 43  | 54.9 | 41.3 - 67.8 | 10 | 12.3 | 5.1 - 27.1  | 19 | 23.9 | 14.4 - 36.9 | 0  | 0.0 | 0.00 - 0.00 | 5   | 8.9  | 3.7 - 19.9  |
| Q5 (Richest)              | 23  | 32.2 | 19.4 - 48.8 | 14 | 23.6 | 11.9 - 41.3 | 22 | 33.0 | 19.4 - 50.3 | 7  | 9.5 | 4.4 - 19.0  | 1   | 1.7  | 0.2 - 10.9  |
| <b>Maluku &amp; Papua</b> |     |      |             |    |      |             |    |      |             |    |     |             |     |      |             |
| Q1 (Poorest)              | 128 | 17.9 | 13.8 - 23.0 | 34 | 5.5  | 3.3 - 9.0   | 10 | 1.6  | 0.4 - 5.7   | 3  | 0.3 | 0.1 - 0.8   | 589 | 74.7 | 68.6 - 79.9 |
| Q2                        | 94  | 44.1 | 36.7 - 51.6 | 25 | 8.2  | 4.3 - 14.9  | 18 | 6.8  | 3.5 - 13.0  | 3  | 1.8 | 0.4 - 7.3   | 122 | 39.2 | 30.9 - 48.0 |
| Q3                        | 72  | 41.9 | 30.8 - 53.9 | 20 | 14.7 | 7.5 - 26.7  | 15 | 11.4 | 6.9 - 18.3  | 5  | 3.2 | 0.9 - 10.6  | 54  | 28.7 | 21.1 - 37.7 |
| Q4                        | 59  | 47.9 | 38.3 - 57.6 | 15 | 10.6 | 5.3 - 20.1  | 20 | 13.6 | 7.9 - 22.5  | 7  | 5.0 | 1.7 - 13.9  | 41  | 22.9 | 16.1 - 31.5 |
| Q5 (Richest)              | 22  | 45.7 | 27.5 - 65.2 | 16 | 15.2 | 7.1 - 29.6  | 10 | 22.7 | 8.4 - 48.5  | 8  | 5.8 | 2.6 - 12.5  | 11  | 10.6 | 4.3 - 23.9  |

\*This table examined variations of births in 2017 (vaginal births at private/public, CS births at private/public) across different main regions and wealth quintiles in Indonesia. This table has been graphed on Figure 3. This table shows that higher births (both vaginal births and CS births) occurring at private facilities in Western Indonesia, but this trend reversed in Eastern Indonesia where higher births (vaginal births and CS births) are observed at public facilities. Higher proportions of CS are also observed at Western Indonesia as compared to Eastern Indonesia, where vaginal births are higher. It also reveals how births, both vaginal births and CS births, at private facilities are increasing as economic status increases.
